# Supplementary material
Source: Springer Nature journal article supplement (https://www.springermedizin.de/resource/supplementary/12888_2010_650_MOESM1_ESM.pdf/9478048)
Supplement: MOESM1 [file 9478048]

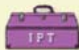

- [Introduction](#)
- How does IPT work?
- My stressful events
- Feedback
- IPT areas
- Role disputes
- Importance of relationships
- My relationship diagram
- Quality of relationships
- Expectations
- Changing the circumstances
- Resolving the dispute
- Summary of the steps
- Julie's role dispute
- Julie uses the questions
- Julie's options
- Resolving my disputes

## Interpersonal Psychotherapy for the prevention of depression

### What is Interpersonal Psychotherapy or IPT?

IPT is a form of therapy developed by Myrna M Weissman. It is designed to treat both major depression and dysthymia. Dysthymia is a milder but more chronic form of depression.

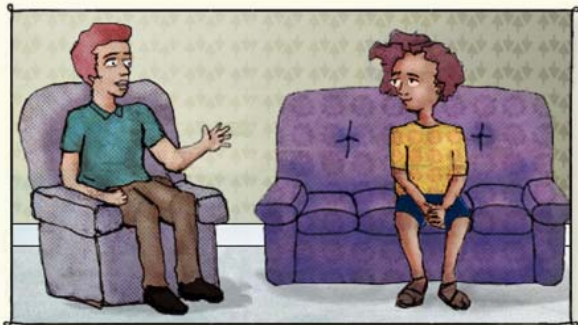

IPT is a talking therapy. IPT is usually conducted in a room with a counsellor but it can be learned from a book or even from e-couch!

Importantly, IPT has been found to be **effective in lowering depression** for people with mild or moderate symptoms. It works as well as antidepressant drugs.

[Key References](#)
